# Supplementary material for: Shape of CeO2 nanoparticles using simulated amorphisation and recrystallisation
Source: Royal Society of Chemistry journal article supplement (doi:10.1039/b408752f), 2004-01-01
Supplement: b408752f.pdf [file b408752f.pdf]

Supplementary Information

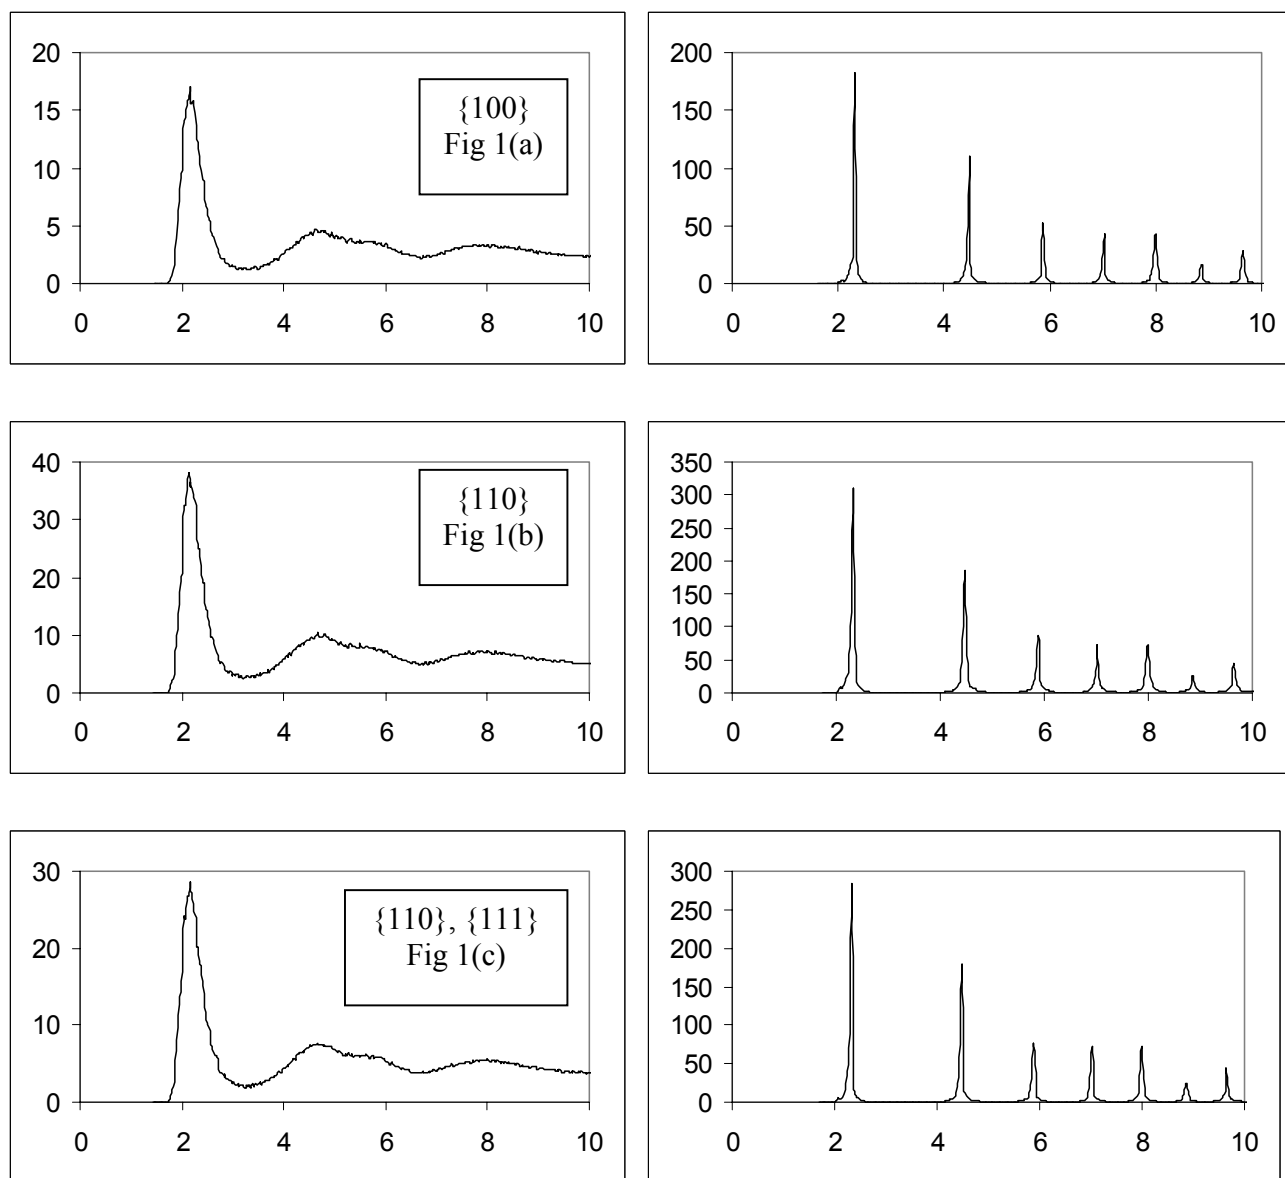

Fig. 1S Ce-O Radial Distribution Functions (RDF), calculated, left, for the amorphous configurations after 40ps and right the corresponding RDF for the final, 0K, configuration. Abscissa: Ce-O interatomic separation (Å); Ordinate:  $g(r)$ .
